# Supplementary material for: Biomechanical assessment of disease outcome in surgical intervention for medial meniscal posterior root tears: efficacy and considerations
Source: Research Square preprint supplement (doi:10.21203/rs.3.rs-1863432/v1), 2022-07-19
Supplement: Supplementary file 1 [file dafd1b7d68a3ab30f288bfab.xlsx]

## Sheet: Sheet1
	Medial compartment peak stress（MPa）
	Gait cycle（%）	Intact knee	Slight root tear	Severe root tear	Entire root tear	Meniscus repair	Partial menisectomy
	0	12.94	13.83	20.28	8.16	28.92	3.36
	10	11.09	9.88	10.65	17.01	12.05	11.35
	20	10.33	10.92	13.45	17.87	10.66	6.41
	30	13.2	14.22	16.67	21.45	15.33	12.71
	40	15.34	15.14	17.37	36.11	16.84	28.57
	50	19.84	9.1	11.44	17.59	9.48	10.21
	60	16.07	7.91	20.23	17.83	7.38	9.82
	70	24.41	16.53	16.65	13.54	17.58	16.45
	80	19.95	19.02	17.1	19.78	26.8	22.73
	90	13.01	13.92	19.7	17.69	28.83	3.25
	100	12.94	13.83	20.28	8.16	28.92	3.36
	Max	24.41	19.02	20.28	36.11	28.92	28.57
	Average	15.3745	13.1182	16.7109	17.7445	18.4355	11.6564
	Lateral compartment peak stress（MPa）
	Gait cycle（%）	Intact knee	Slight root tear	Severe root tear	Entire root tear	Meniscus repair	Partial menisectomy
	0	3.18	3.14	1.5	3.45	1.73	8.16
	10	25.6	26.08	26.18	25.65	25.72	25.42
	20	28.45	28.87	29.46	25.34	28.48	28.61
	30	10.15	9.75	10.26	6.78	10.59	8.1
	40	23.42	20.78	23.04	19.69	21.8	15.13
	50	29.21	30.7	30.35	30.61	30.01	31.86
	60	9.9	10.51	9.98	8.16	8.73	9.14
	70	7.77	8.32	7.65	4.79	7.27	7.38
	80	4.71	4.26	4.51	2.57	4.07	7.51
	90	2.22	2.14	2.37	2.3	2.36	7.85
	100	3.18	3.14	1.5	3.45	1.73	8.16
	Max	29.21	30.7	30.35	30.61	30.01	31.86
	Average	13.4355	13.4264	13.3455	12.0718	12.9536	14.3018
	Maximum stress of medial meniscus root (MPa)
	Gait cycle（%）	Intact knee	Slight root tear	Severe root tear	Entire root tear	Meniscus repair	Partial menisectomy
	0	1.29	2.52	6.95	X	2.29	1.83
	10	0.96	3.38	7.15	X	5.94	7.7
	20	2.42	7.02	19.05	X	14.15	4.33
	30	5.67	3.69	16.89	X	8.7	5.29
	40	2.67	2.64	12.53	X	6.59	5.62
	50	1.34	5.11	16.53	X	11.49	8.93
	60	6.89	6.06	20.87	X	7.94	9.43
	70	5.76	3.56	12.34	X	9.36	7.25
	80	3.56	3.1	11.82	X	14.99	5.69
	90	5.83	2.59	7.36	X	1.99	1.79
	100	1.29	2.52	6.95	X	2.29	1.83
	Max	6.89	7.02	20.87	X	14.99	9.43
	Average	3.42545	3.83545	12.5855	X	7.79364	5.42636
	Maximum stress of medial tibial plateau (MPa)
	Gait cycle（%）	Intact knee	Slight root tear	Severe root tear	Entire root tear	Meniscus repair	Partial menisectomy
	0	0.37	0.37	0.44	31.66	8.36	31.38
	10	3.39	3.43	3.18	7.44	7.9	8.35
	20	2.86	2.98	3.29	10.37	10.5	9.74
	30	5.22	5.31	5.63	6.67	18.43	8.83
	40	5.42	5.53	5.62	9.31	7.45	9.23
	50	2.07	2.2	2.2	7.94	4.85	9.77
	60	1.84	2.53	2.58	14.2	14.05	12.74
	70	4.67	5.64	5.35	54.69	17.98	13.19
	80	3.81	4.07	4.44	57.71	8.79	54.13
	90	1.76	2.08	2.6	11.44	11.44	56.01
	100	0.37	0.37	0.44	31.66	8.36	31.38
	Max	5.42	5.64	5.63	57.71	18.43	56.01
	Average	2.88909	3.13727	3.25182	22.0991	10.7373	22.25
	Maximum displacement (mm)
	Gait cycle（%）	Intact knee	Slight root tear	Severe root tear	Entire root tear	Meniscus repair	Partial menisectomy
	0	0.38	0.5	0.56	0.81	0.39	0.32
	10	0.94	1	1.06	6.29	1.05	1.61
	20	1.73	1.68	1.87	6.39	1.77	0.88
	30	1.13	1.19	1.28	6.26	1.22	1.63
	40	0.89	0.9	0.95	6.21	0.88	1.82
	50	1.43	1.6	1.59	6.28	1.64	1.53
	60	1.17	1.64	1.25	6.28	1.23	1.22
	70	1.3	1.38	1.46	6.17	1.42	2.38
	80	1.66	1.73	1.85	6.2	1.77	2.84
	90	0.94	0.85	1.05	6.26	0.63	0.35
	100	0.38	0.5	0.56	0.81	0.39	0.32
	Max	1.73	1.73	1.87	6.39	1.77	2.84
	Average	1.08636	1.17909	1.22545	5.26909	1.12636	1.35455
	Femoral cartilage contact area (mm²)
	Gait cycle（%）	Intact knee	Slight root tear	Severe root tear	Entire root tear	Meniscus repair	Partial menisectomy
	0	21.99	22.27	19.6	0	7.79	0
	10	129.43	118.43	122.97	51.04	121.01	92.87
	20	142.6	121.35	131.36	79.91	123.87	72.24
	30	225.47	204.02	210.09	68.45	203.64	59.9
	40	263.04	245.46	242.98	163.04	243.59	203.55
	50	113.56	102.43	104.46	38.98	105.98	91.7
	60	103.08	96.98	78.45	15.18	92.95	71.65
	70	114.3	101.34	98.27	45.66	103.03	64.48
	80	148.26	130.87	134.51	83.29	130.15	110.58
	90	8.84	3.43	3.43	0	0	0
	100	21.99	22.27	19.6	0	7.79	0
	Max	263.04	245.46	242.98	163.04	243.59	203.55
	Average	117.505	106.259	105.975	49.5955	103.618	69.7245
	Tibial cartilage contact area (mm²)
	Gait cycle（%）	Intact knee	Slight root tear	Severe root tear	Entire root tear	Meniscus repair	Partial menisectomy
	0	11.84	8.04	9.42	6.04	6.67	10.51
	10	161.1	151.27	141.94	147.98	138.54	146.33
	20	154.66	146.56	147.64	138.22	146.89	173.86
	30	254.52	217.71	222.79	150.63	227.29	151.51
	40	268.71	254.6	252.52	160.04	257.64	141.13
	50	146.59	128.97	132.9	153.7	134.44	170.61
	60	162.59	135.79	123.47	119.68	117.04	105.74
	70	124.1	116.68	110.04	97.3	116.42	112.24
	80	155.17	144.81	145.61	81.92	140.45	111.12
	90	7.48	8.67	5.21	109.71	6.64	66.8
	100	11.84	8.04	9.42	6.04	6.67	10.51
	Max	268.71	254.6	252.52	160.04	257.64	173.86
	Average	132.6	120.104	118.269	106.478	118.063	109.124
